# Supplementary material
Source: Springer Nature journal article supplement (https://www.springermedizin.de/resource/supplementary/12955_2012_1025_MOESM6_ESM.pdf/9558674)

**(A)**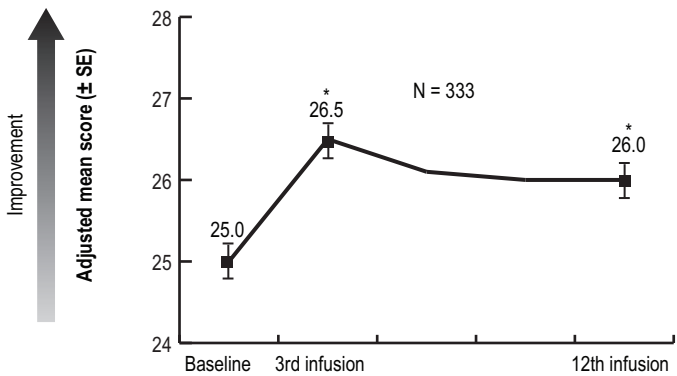

|                                           |      |      |
|-------------------------------------------|------|------|
| <b>MOS-Cog score change from baseline</b> | +1.6 | +1.0 |
|-------------------------------------------|------|------|

**(B)**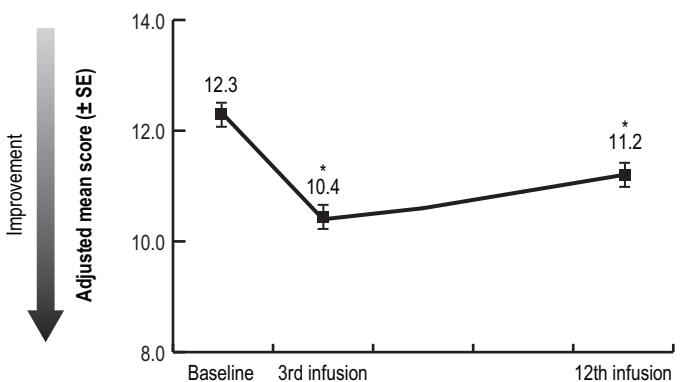

|                                          |      |      |
|------------------------------------------|------|------|
| <b>MFIS-5 score change from baseline</b> | -1.9 | -1.2 |
|------------------------------------------|------|------|

**(C)**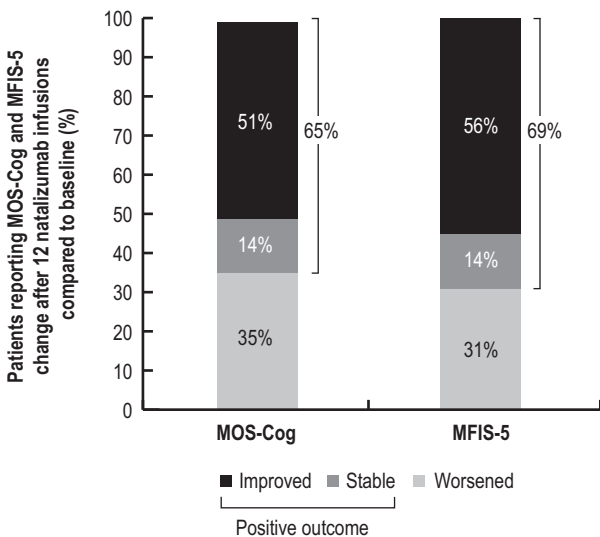

Supplement: MOESM6 [file 9558674]
